# Supplementary material for: Speed and Cardiac Recovery Variables Predict the Probability of Elimination in Equine Endurance Events
Source: PubMed Central journal article supplement (PMC4556447; doi:10.1371/journal.pone.0137013), 2015-08-31
Supplement: pone.0137013.s002.pdf [file pone.0137013.s002.pdf]

Table S2: Distribution of horses according to the number of starts, number of eliminations, reason for elimination, distance categories and country where the race has been organized.

| Number of starts<br>N = 7032 | Q    | EL   | Reason for elimination |     |     |     | Distance category of eliminations |      |      | Country of eliminations |      |         |
|------------------------------|------|------|------------------------|-----|-----|-----|-----------------------------------|------|------|-------------------------|------|---------|
|                              |      |      | LA                     | ME  | RET | OR  | 1*                                | 2**  | 3*** | UAE                     | FRA  | SPA-POR |
| 1                            | 543  | 269  | 715                    | 196 | 134 | 60  | 945                               | 1257 | 246  | 621                     | 1610 | 217     |
| 2                            | 1031 | 666  | 442                    | 89  | 98  | 37  | 500                               | 962  | 235  | 273                     | 1311 | 113     |
| 3                            | 1343 | 1105 | 280                    | 75  | 68  | 29  | 252                               | 763  | 296  | 108                     | 1124 | 79      |
| 4                            | 859  | 452  | 175                    | 29  | 46  | 19  | 123                               | 471  | 218  | 30                      | 750  | 32      |
| 5                            | 158  | 88   | 62                     | 14  | 18  | 9   | 54                                | 188  | 108  | 2                       | 340  | 8       |
| 6                            | 247  | 103  | 56                     | 5   | 20  | 7   | 26                                | 132  | 88   | 0                       | 236  | 10      |
| 7                            | 18   | 6    | 27                     | 9   | 9   | 2   | 8                                 | 67   | 51   | 0                       | 122  | 4       |
| 8                            | 79   | 47   | 6                      | 0   | 0   | 0   | 2                                 | 13   | 9    | 0                       | 24   | 0       |
| 9                            | 16   | 2    | 2                      | 0   | 0   | 0   | 1                                 | 5    | 12   | 0                       | 17   | 1       |
| Total                        | 4294 | 2738 | 1765                   | 417 | 393 | 163 | 1911                              | 3858 | 1263 | 1034                    | 5534 | 464     |

Q: qualified; EL: Eliminated; OR: Other Reasons; LA: Lameness; ME: Metabolic; RET: Retirement.

Distance categories - 1\* = 80-119 km; 2\* = 120-139 km; 3\* = 140-160. SPA-POR: Spain-Portugal;

UAE: United Arab Emirates. FRA: France.
