# Supplementary material for: Speed and Cardiac Recovery Variables Predict the Probability of Elimination in Equine Endurance Events
Source: PubMed Central journal article supplement (PMC4556447; doi:10.1371/journal.pone.0137013), 2015-08-31
Supplement: pone.0137013.s004.pdf [file pone.0137013.s004.pdf]

Table S4: Results of the logistic regression, with an estimation of the probability of elimination as a function of the event outcome and the reason for elimination at each vet gate (based on variables recorded at the previous vet gate).

| Veterinary examinations                   | Vet gate 2                                             | Vet gate 3                                             | Vet gate 4                                             | Vet gate 5                                             |
|-------------------------------------------|--------------------------------------------------------|--------------------------------------------------------|--------------------------------------------------------|--------------------------------------------------------|
| Number of observations                    | 1151                                                   | 1961                                                   | 874                                                    | 113                                                    |
| Explanatory variables*                    | AS <sub>1</sub><br>CRT <sub>1</sub><br>HR <sub>1</sub> | AS <sub>2</sub><br>CRT <sub>2</sub><br>HR <sub>2</sub> | AS <sub>3</sub><br>CRT <sub>3</sub><br>HR <sub>3</sub> | AS <sub>4</sub><br>CRT <sub>4</sub><br>HR <sub>4</sub> |
| Categorical variable *                    | Outcome of the competition (Q, LA, ME, RET, OR)        | Outcome of the competition (Q, LA, ME, RET, OR)        | Outcome of the competition (Q, LA, ME, RET, OR)        | Outcome of the competition (Q, LA, ME, RET, OR)        |
| Percentage of horses correctly classified | 63.90%                                                 | 54.10%                                                 | 51.10%                                                 | 73.50%                                                 |
| AUC of ROC, Means (SD)                    | 0.58 (0.02)                                            | 0.60 (0.04)                                            | 0.62 (0.07)                                            | 0.78 (0.02)                                            |
| Estimated R <sup>2</sup>                  | 0.02                                                   | 0.04                                                   | 0.06                                                   | 0.25                                                   |

\*explanatory and categorical variables included in the logistic regression by the Newton-Raphson method. AS<sub>n-1</sub>: average speed measured before vet gate n; CRT<sub>n-1</sub>: cardiac recovery time before Vet gate n; HR<sub>n-1</sub>: heart rate measured before vet gate n; Q: qualified; LA: lameness; ME: metabolic disorders; RET: .retired; OR: other reasons; AUC: Area under curve; ROC: Receiver operating characteristic.
